# Supplementary material for: A coumarin-based fluorescent chemosensor as a Sn indicator and a fluorescent cellular imaging agent
Source: Royal Society of Chemistry journal article supplement (doi:10.1039/d2ra07884h), 2023-01-01
Supplement: d2ra07884h1.pdf [file d2ra07884h1.pdf]

## Supporting information

### **Title: A coumarin-based fluorescent chemosensor as Sn indicator and a fluorescent cellular imaging agent**

Hamide Hosseinjani-Pirdehi <sup>a</sup>, Soode Amigh <sup>b</sup>, Afshan Mohajeri <sup>c</sup>, Elahe Nazeri <sup>a</sup>, Amir Taheri <sup>a</sup>,  
Keivan Majidzadeh-A <sup>a</sup>, Zahra Mohammadpour <sup>d,\*</sup>, Rezvan Esmaeili <sup>a,\*</sup>

<sup>a</sup> *Genetics Department, Breast Cancer Research Center, Motamed Cancer Institute, ACECR, Tehran, Iran*

<sup>b</sup> *Department of Chemistry, Shahid Bahonar University of Kerman, Kerman, Iran*

<sup>c</sup> *Department of Chemistry, College of Sciences, Shiraz University, Shiraz 7194684795, Iran.*

<sup>d</sup> *Biomaterials and Tissue Engineering Department, Breast Cancer Research Center, Motamed Cancer Institute, ACECR, Tehran, Iran*

*Corresponding author: Rezvan Esmaeili, Zahra Mohammadpour*

*Email: [esmaeili.rezvan@gmail.com](mailto:esmaeili.rezvan@gmail.com), [r\\_esmaeili@acecr.ac.ir](mailto:r_esmaeili@acecr.ac.ir), [mohammadpour@acecr.ac.ir](mailto:mohammadpour@acecr.ac.ir)*

### Characterization of 1

Mp. = 211 - 213 °C; calculated MW = 334.05; ESI-MS  $m/z$  = 334, 120, 92; FT-IR (KBr,  $\nu/\text{cm}^{-1}$ ): 3400 (OH stretch), 1697 (C=O stretch);  $^1\text{H}$  NMR (500 MHz,  $\text{CDCl}_3$ )  $\delta$  (ppm): 12.51 (s, 2H), 7.80 (d.d,  $J=8.00, 1.5\text{Hz}$ , 2H), 7.34 (d.t,  $J=7.75, 1.5\text{Hz}$ , 2H), 7.35 (d,  $J=7.35\text{Hz}$ , 2H), 7.33 (t,  $J=7.33\text{Hz}$ , 2H), 5.60 (s, 2H);  $^{13}\text{C}$  NMR (125 MHz,  $\text{CDCl}_3$ )  $\delta$  (ppm): 166.1, 162.3, 154.0, 133.2, 124.3, 123.6, 116.8, 116.3, 91.5, 19.1; Anal. Calcd. For  $\text{C}_{19}\text{H}_{12}\text{O}_6$ (%): C, 67.86; H, 3.60. Found: C, 67.84; H, 3.61.

### Characterization of 2a

Mp=184-186°C; calculated MW = 360; ESI-MS  $m/z$  = 360, 120, 92; FT-IR (KBr,  $\nu/\text{cm}^{-1}$ ): 3230 (OH Stretch), 1718 (C=O stretch);  $^1\text{H}$  NMR (500 MHz,  $\text{CDCl}_3$ )  $\delta$  (ppm): 7.97 (t,  $J=9.00\text{Hz}$ , 2H), 7.60 (t,  $J=7.75\text{Hz}$ , 1H), 7.39 (t,  $J=7.75\text{Hz}$ , 1H), 7.38 (t,  $J=6.50\text{Hz}$ , 2H), 7.29 (d,  $J=8.00\text{Hz}$ , 2H), 7.27 (d,  $J=8.50\text{Hz}$ , 2H), 3.70 (bs, 2H);  $^{13}\text{C}$  NMR (125 MHz,  $\text{CDCl}_3$ )  $\delta$  (ppm): 163.2, 152.6, 152.2, 132.3, 131.9, 124.5, 123.9, 123.1, 116.8, 116.1, 101.8, 25.0; Anal. Calcd. For  $\text{C}_{21}\text{H}_{12}\text{O}_6$  (%): C, 70.00; H, 3.36. Found: C, 69.78; H, 3.39.

### Characterization of 2b

Mp=230-232 °C; calculated MW = 378; ESI-MS  $m/z$  = 378, 120, 92; FT-IR (KBr,  $\nu/\text{cm}^{-1}$ ): 3492, 3238 (OH Stretch), 1717, 1671 (C=O stretch);  $^1\text{H}$  NMR (500 MHz,  $\text{DMSO-d}_6$ )  $\delta$  (ppm): 11.62 (s, 1H), 8.00 (d,  $J=8.00\text{Hz}$ , 1H), 7.88 (d,  $J=7.50\text{Hz}$ , 1H), 7.64 (t,  $J=8.50\text{Hz}$ , 1H), 7.61 (t,  $J=8.00\text{Hz}$ , 1H), 7.42- 7.36 (m, 6H), 5.63 (t, 3.00Hz, 1H), 4.42 (s, 1H), 2.32 (d.d.d,  $J=10.50, 2.50, 1.50\text{Hz}$ , 1H), 2.17 (bs, 1H);  $^{13}\text{C}$  NMR (125 MHz,  $\text{DMSO-d}_6$ )  $\delta$  (ppm): 165.7, 160.9, 160.7, 157.1, 152.3, 152.3, 132.3(2C), 124.7, 124.3, 123.7, 122.7, 116.7 (2C), 116.7, 115.8, 106.4, 104.5, 100.2, 56.6, 30.7; Anal. Calcd. For  $\text{C}_{21}\text{H}_{14}\text{O}_7$  (%): C, 67.67; H, 3.73. Found: C, 67.70; H, 3.71.

### Characterization of 3

Mp= 245-248 °C; calculated Mw= 360; ESI-MS  $m/z$  = 360, 120, 92; FT-IR (KBr,  $\nu/\text{cm}^{-1}$ ): 3467 (OH Stretch), 1718, 1636 (C=O stretch), 1616 (C=C Stretch);  $^1\text{H}$  NMR (500 MHz,  $\text{CDCl}_3$ )  $\delta$  (ppm): 12.54 (s, 1H), 8.96 (t,  $J=13.50\text{Hz}$ , 1H), 8.18 (d,  $J=14.00\text{Hz}$ , 1H), 7.95 (d,  $J=7.50\text{Hz}$ , 1H), 7.67-7.59 (m, 2H), 7.42- 7.23 (m, 5H), 5.60 (bs, 1H);  $^{13}\text{C}$  NMR (125 MHz,  $\text{CDCl}_3$ )  $\delta$  (ppm): 177.9, 166.1, 162.5, 162.3, 161.1, 154.6, 154.0, 134.3(2C), 133.1, 126.5(2C), 124.4, 124.0, 123.7, 121.4, 120.8, 117.1, 116.8, 107.0, 91.5; Anal. Calcd. For  $\text{C}_{21}\text{H}_{12}\text{O}_6$  (%): C, 70.0; H, 3.36. Found: C, 70.06; H, 3.31.

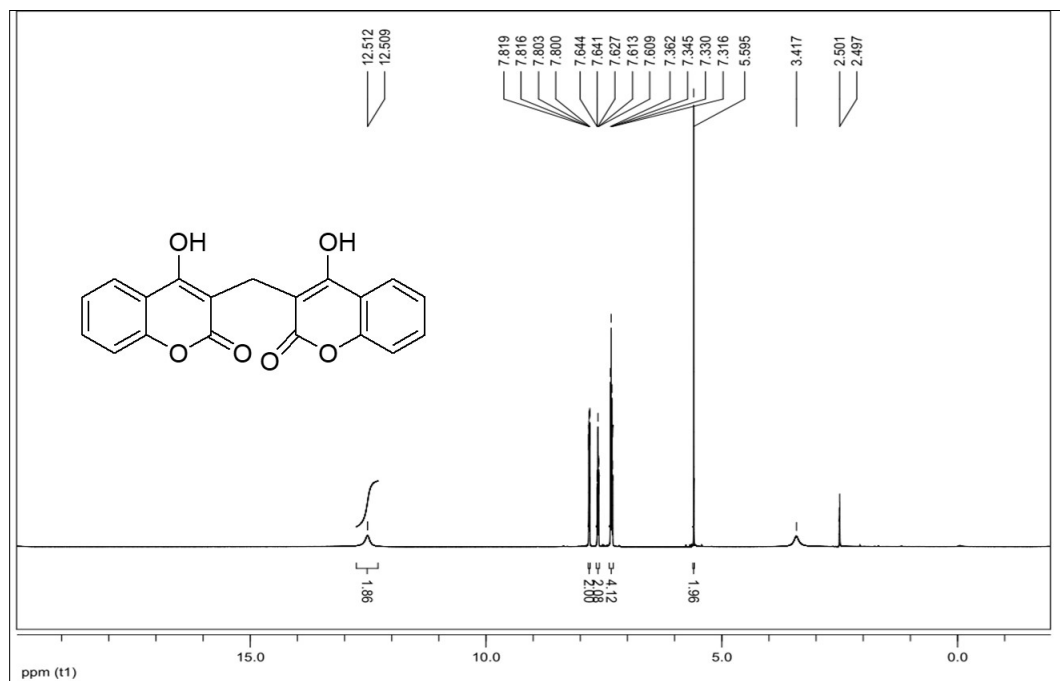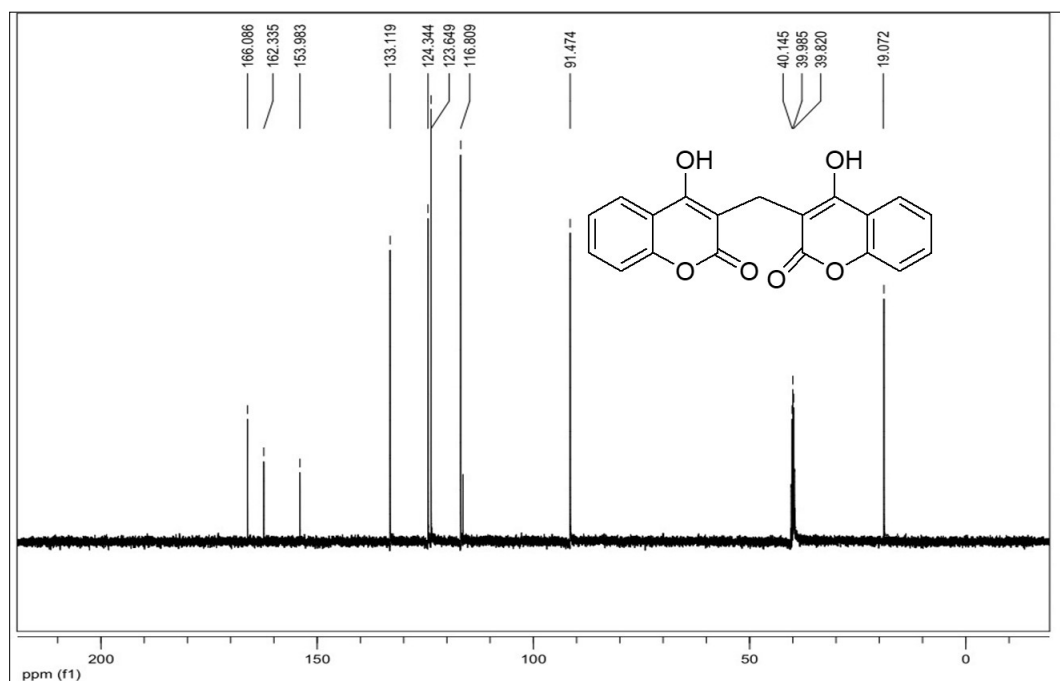

**Figure A.1**  $^1\text{H NMR}$  (500 MHz,  $\text{CDCl}_3$ ) and  $^{13}\text{C NMR}$  (125 MHz,  $\text{CDCl}_3$ ) spectrum of 1

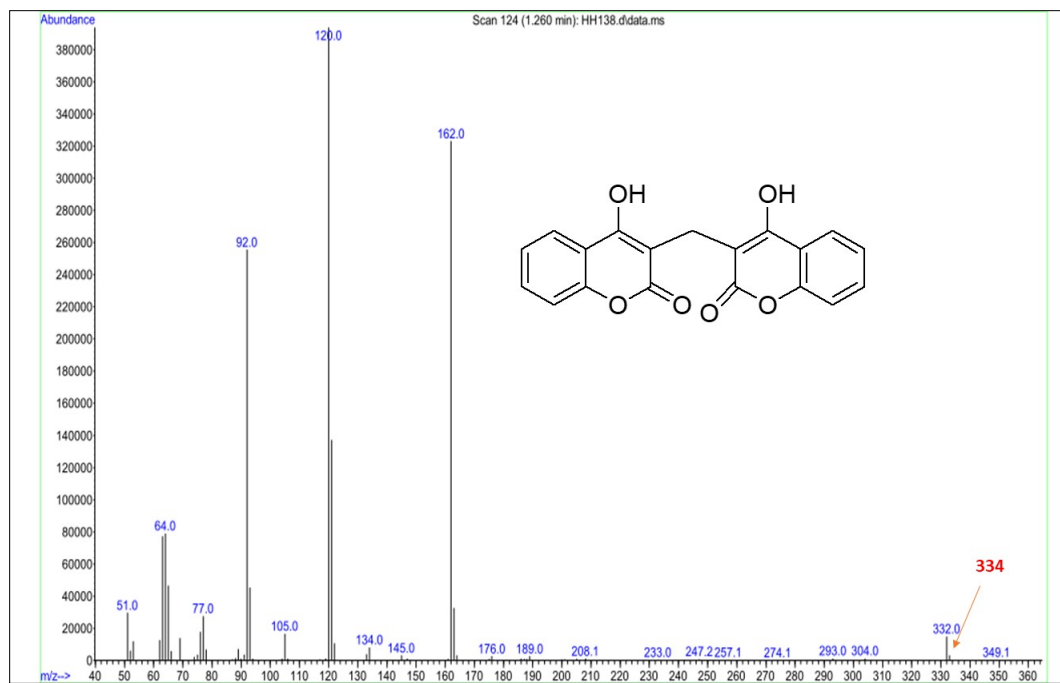

**Figure A.2** Mass spectrum of **1**

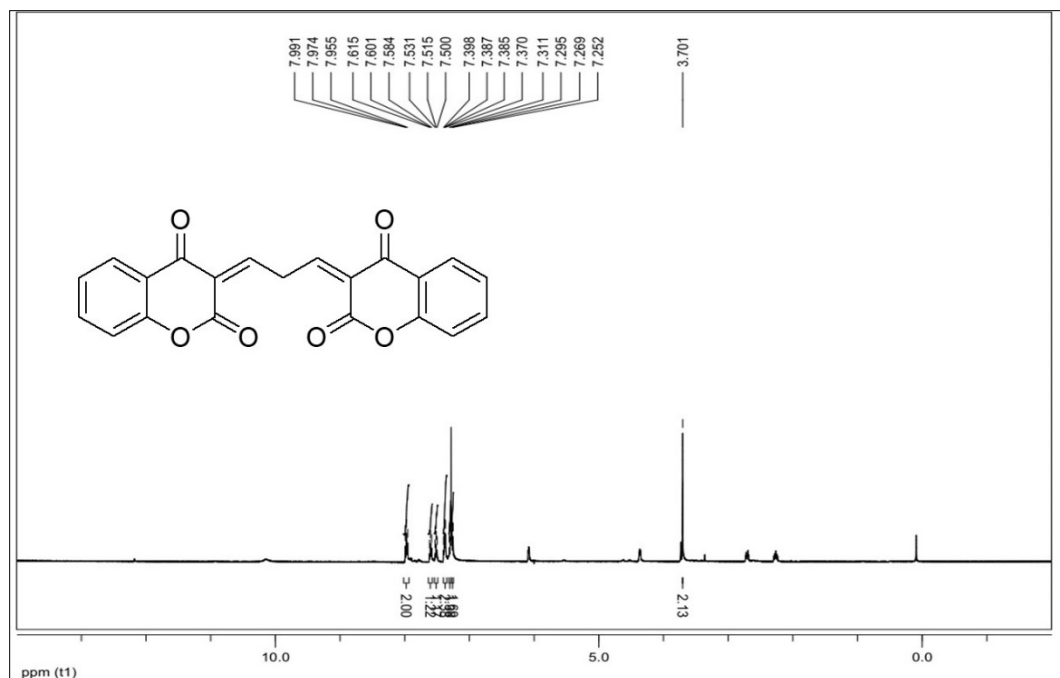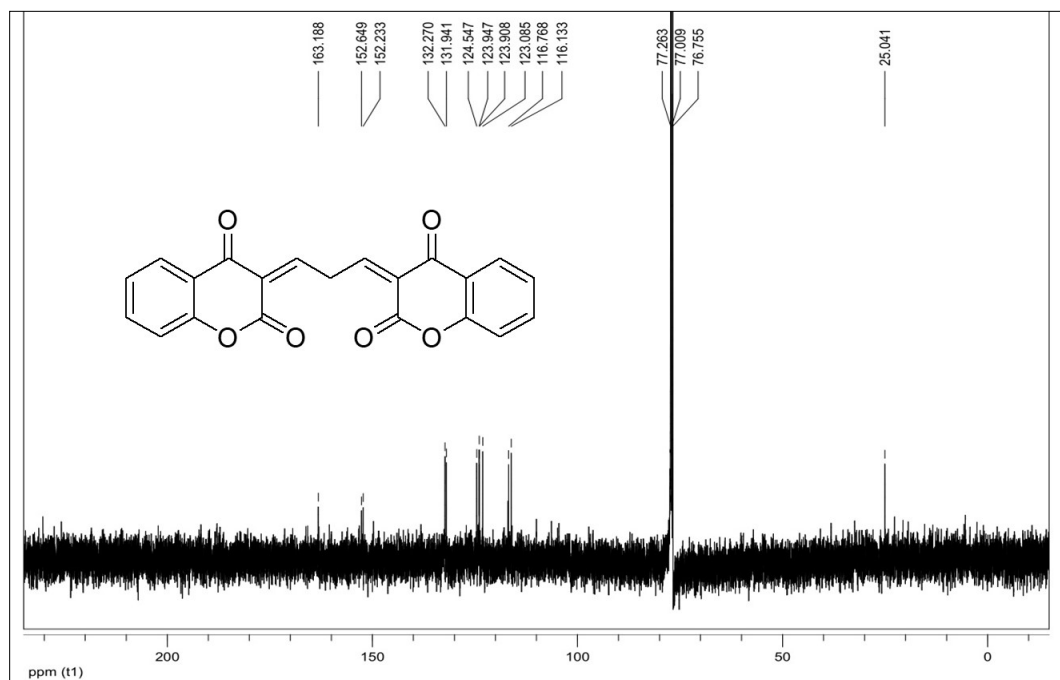

**Figure B.1** <sup>1</sup>H NMR (500 MHz, CDCl<sub>3</sub>) and <sup>13</sup>C NMR (125 MHz, CDCl<sub>3</sub>) spectrum of **2a**

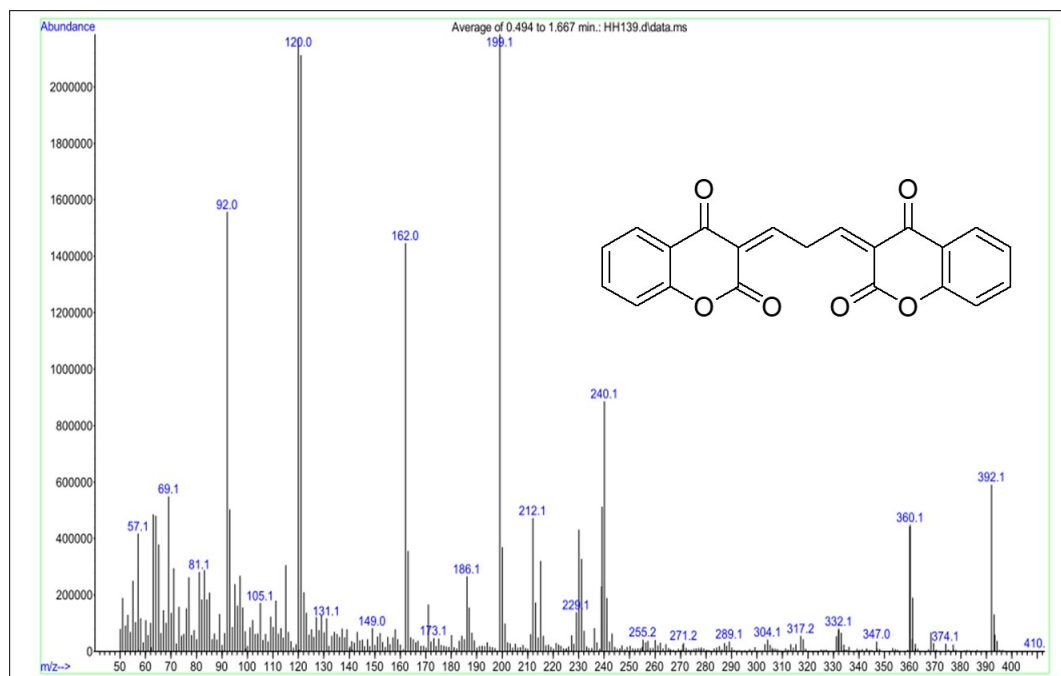

Figure B.2 Mass spectrum of 2a

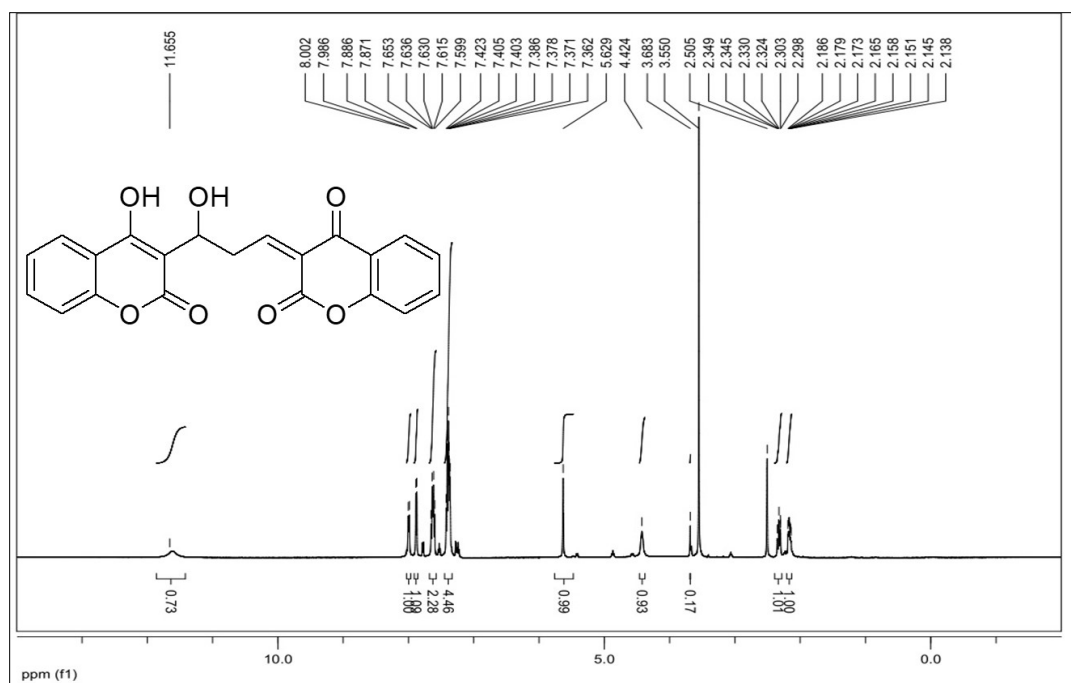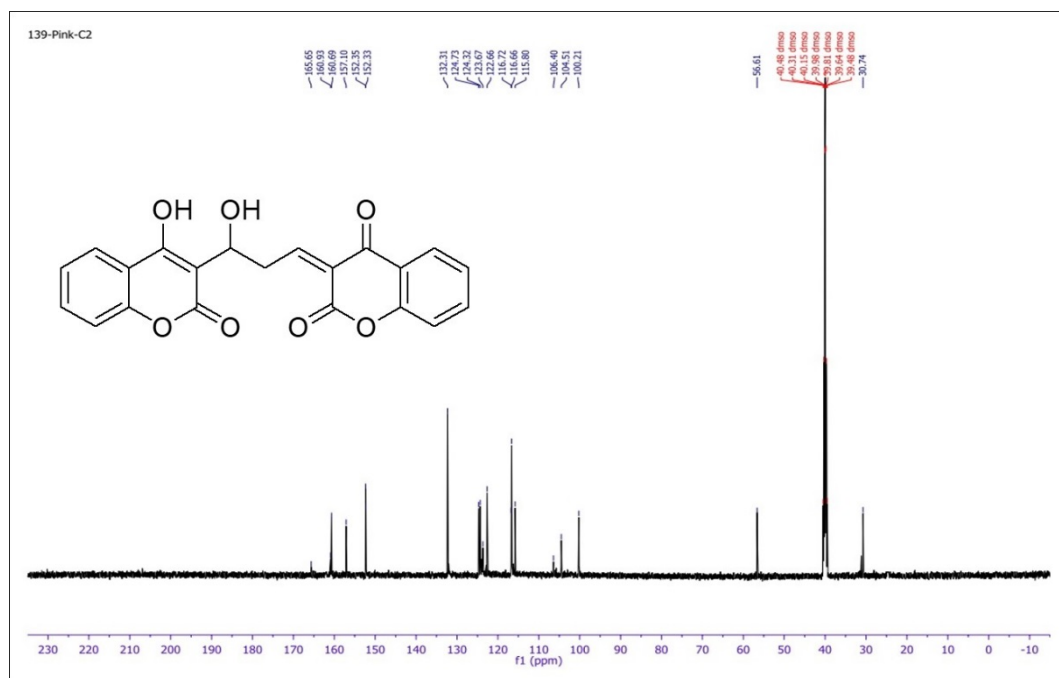

**Figure C.1** <sup>1</sup>H NMR (500 MHz, DMSO-d<sub>6</sub>) and <sup>13</sup>C NMR (125 MHz, DMSO-d<sub>6</sub>) spectrum of 2b

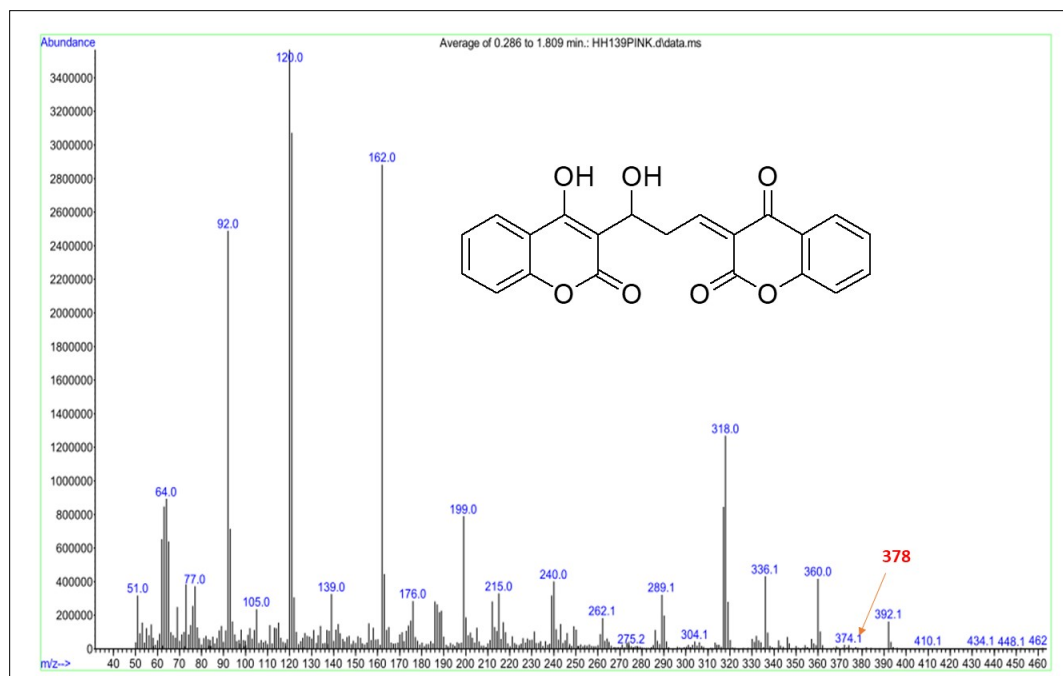

Figure C.2 Mass spectrum of **2b**



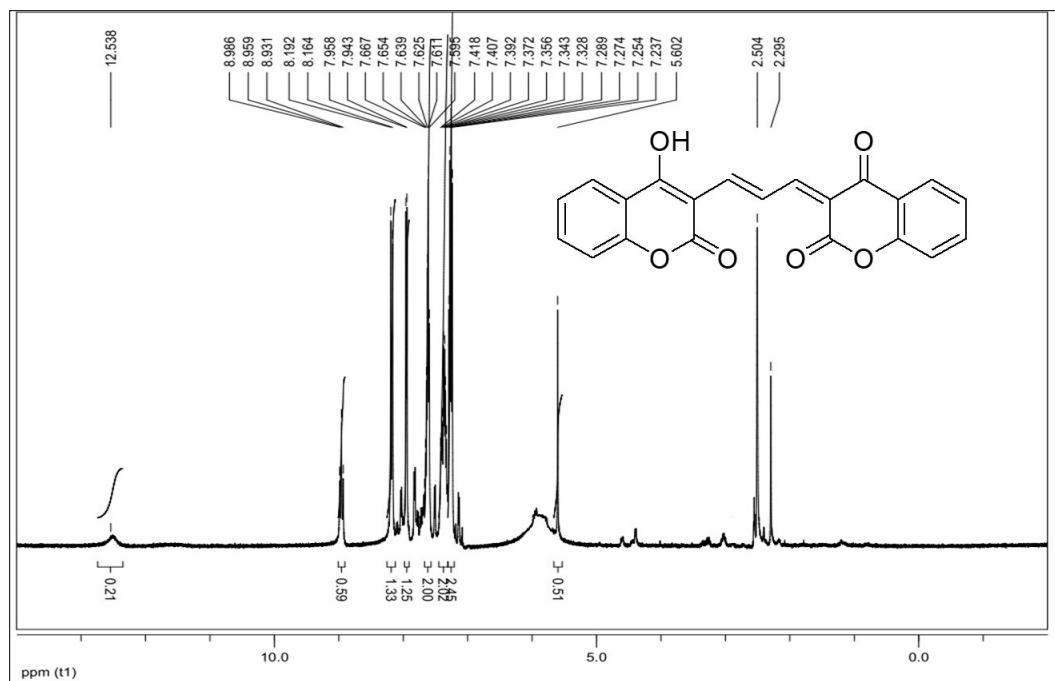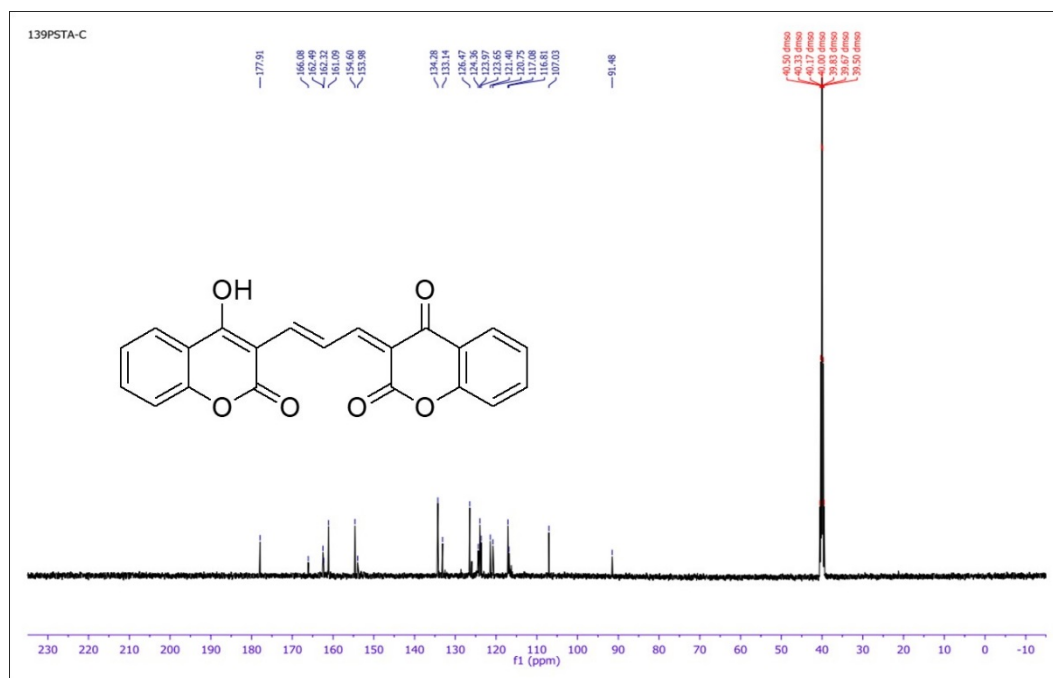

Figure D.1 <sup>1</sup>H NMR (500 MHz, CDCl<sub>3</sub>) and <sup>13</sup>C NMR (125 MHz, CDCl<sub>3</sub>) spectra of 3

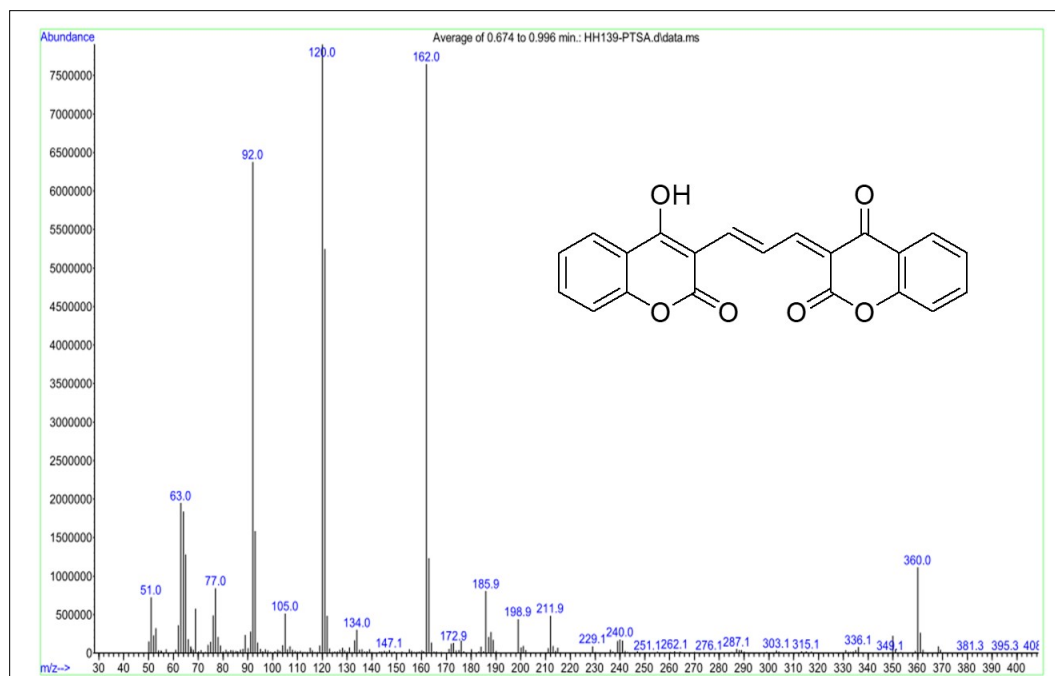

Figure D.2 Mass spectrum of 3

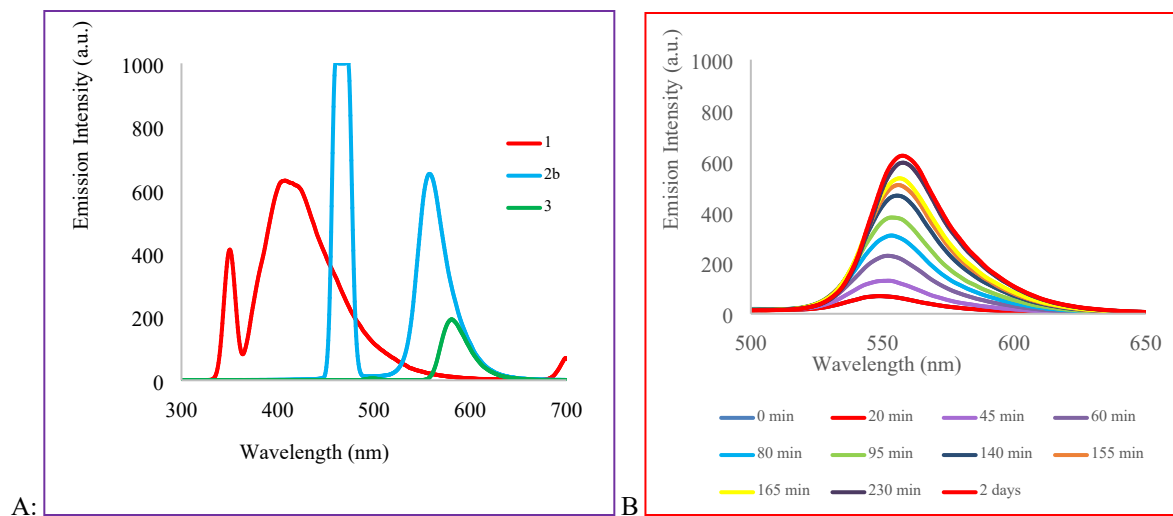

**Figure E.1** (A) Fluorescence spectrum of the synthesized compounds, (B) fluorescence change of 2a (0 min) converting to 2b ( $\lambda_{\text{ex}}=470\text{ nm}$ ,  $\lambda_{\text{em}}=557\text{ nm}$ )

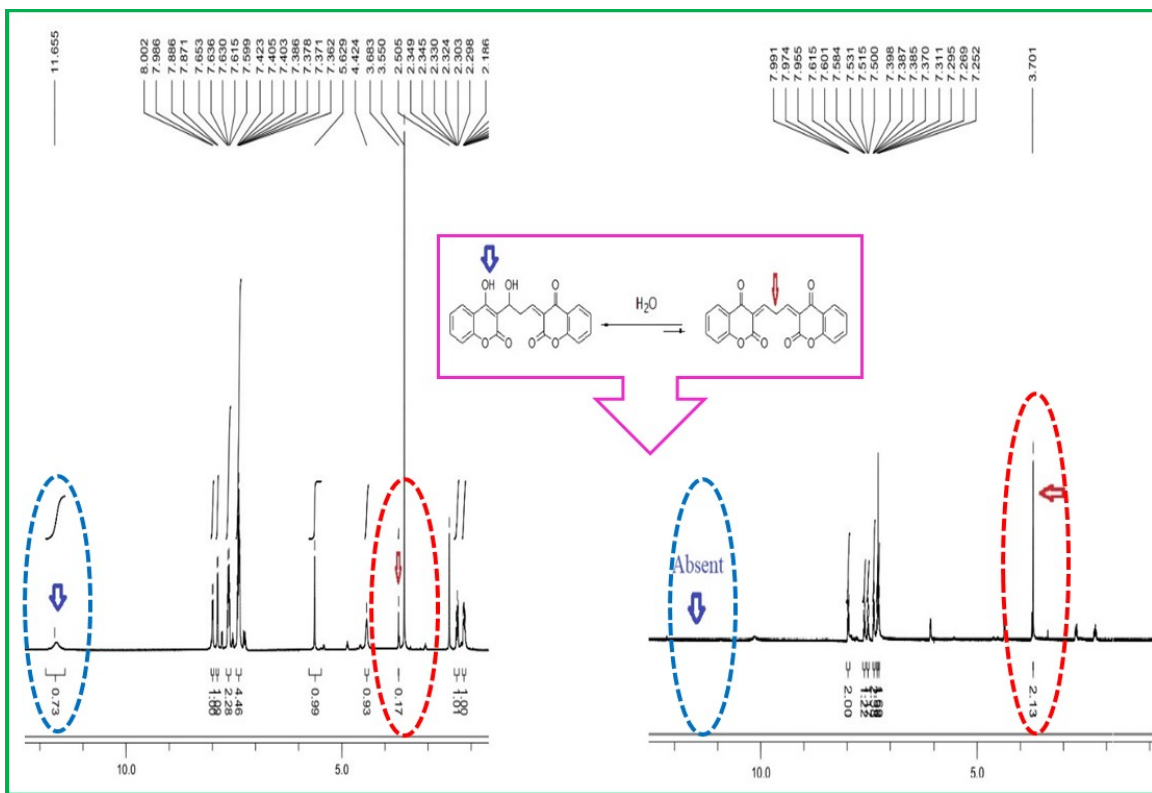

**Figure F.1** <sup>1</sup>H NMR spectroscopy of compound 2a (right) compared to compound 2b (left)

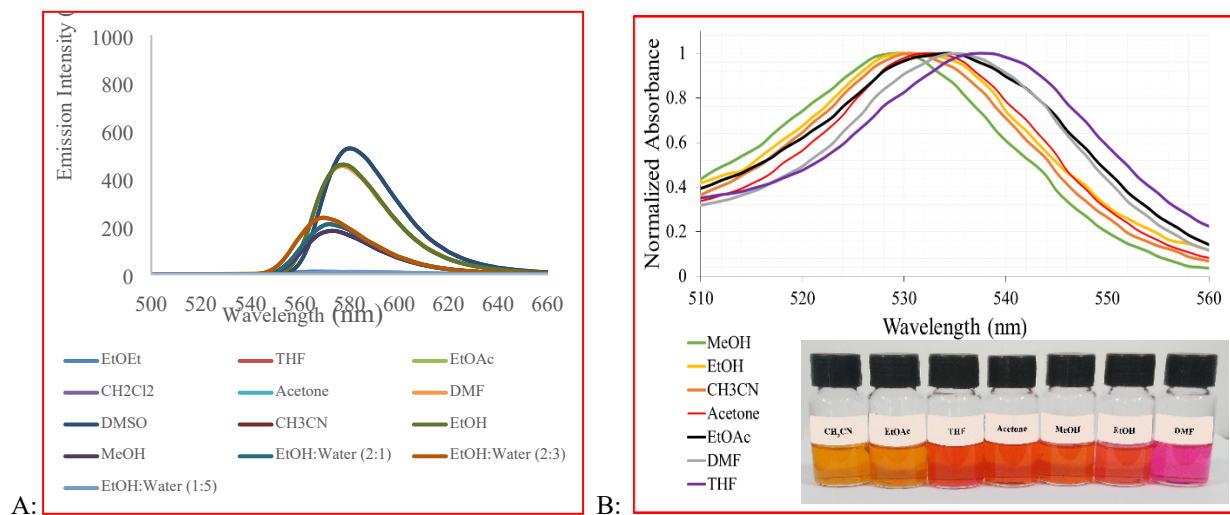

**Figure G.1.** solvatochromic effect of **3** ( $5.0 \times 10^{-5}$  M) investigated via A) fluorescence emission ( $\lambda_{\text{ex}} = 480$  nm) and B) UV-Vis absorption in different solvents; Inset: digital photographs of solvent-dependent color change.

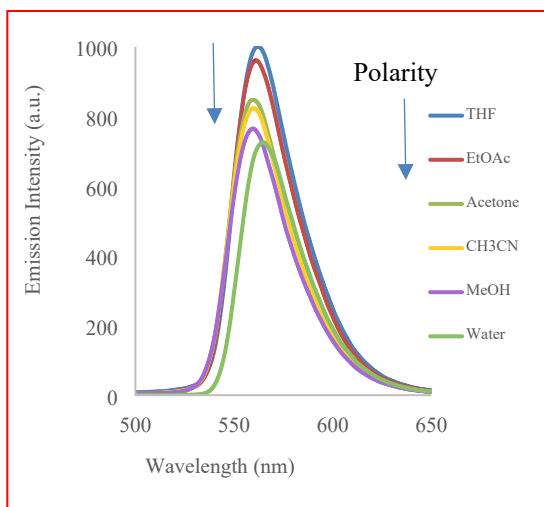

A:

**Figure G.2.** Fluorescence emission of 2b ( $5.0 \times 10^{-5}$  M) in different solvents ( $\lambda_{\text{ex}} = 470$  nm)

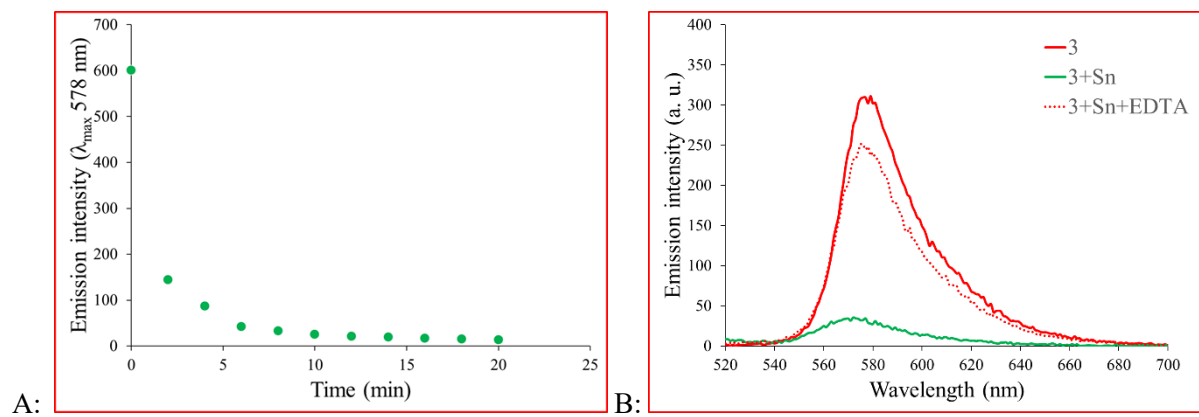

**Figure H.1** A) Response time and B) Reversibility of 3 by the addition of EDTA to the 3+Sn<sup>2+</sup> complex

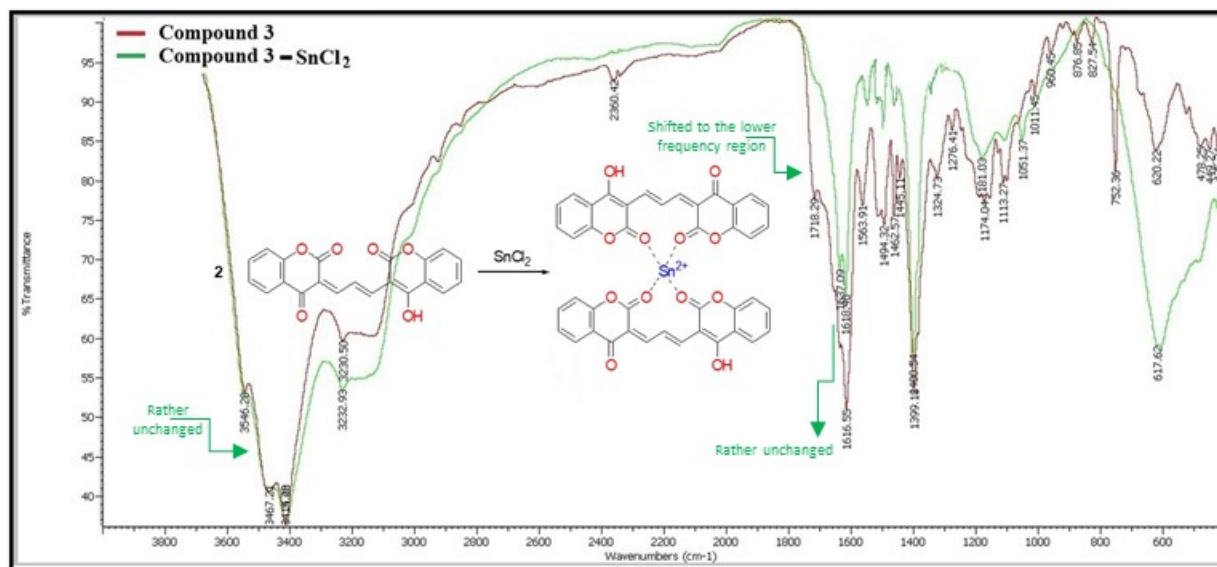

Figure I.1. The possible complex structure of compound 3 with Sn<sup>2+</sup>



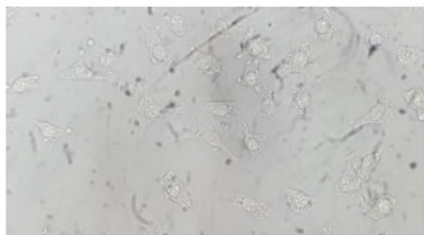

1

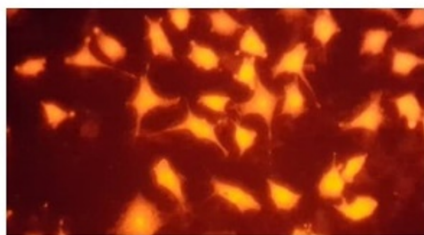

2

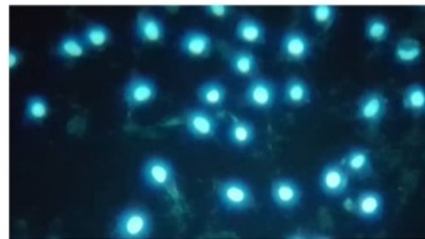

3

**Figure J.1.** Microscopy images of the probe in MCF7 cells. The cells were incubated with probe ( $2.5 \times 10^{-5}$  M) for 60 min at 37 °C, and washed with PBS for 3 times.

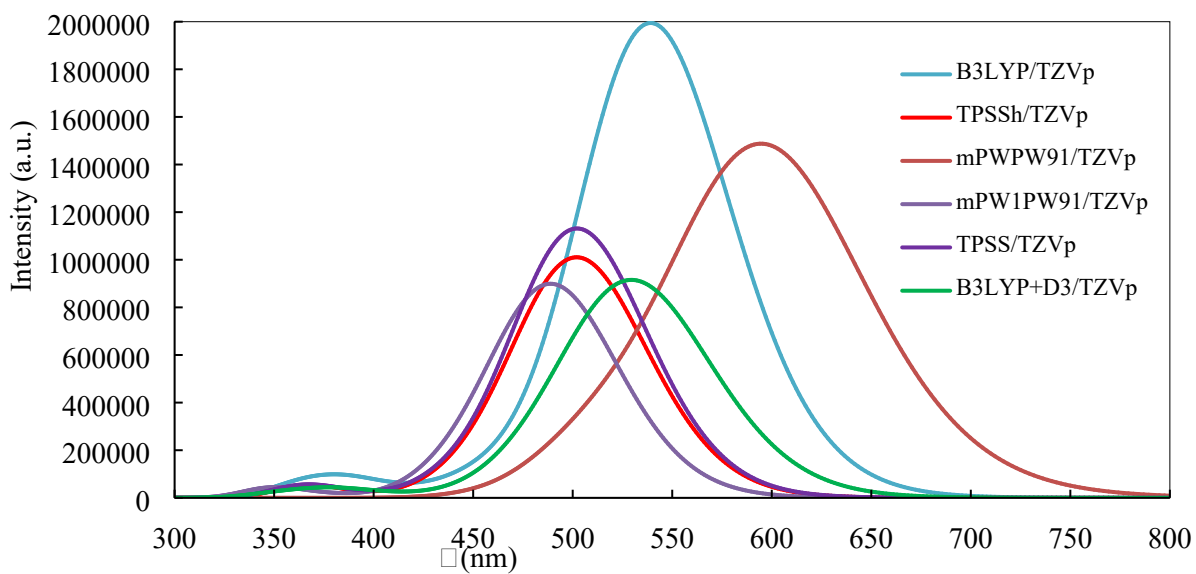

**Figure K1.** Fluorescence spectra of compound **3** at different levels of theory.

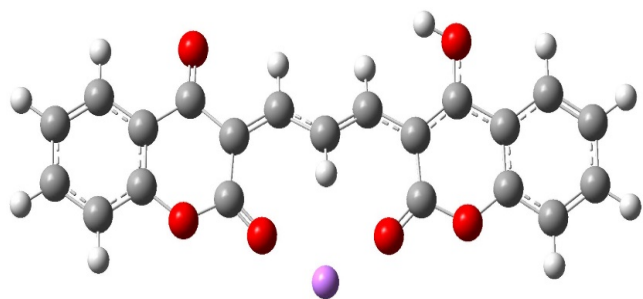

**3-Li<sup>+</sup>**

$$E_{\text{ads}} = -7.38 \text{ kcal mol}^{-1}$$

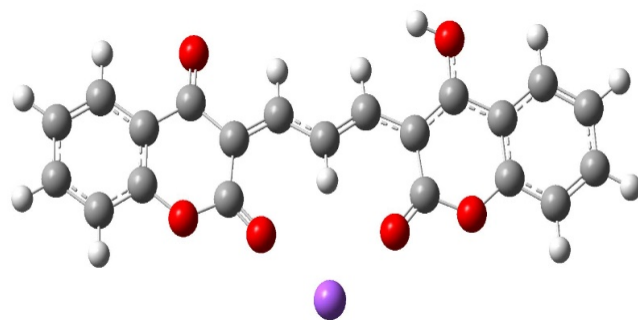

**3-Na<sup>+</sup>**

$$E_{\text{ads}} = -9.27 \text{ kcal mol}^{-1}$$

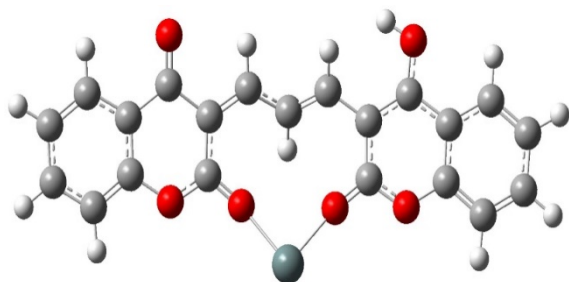

**3-Sn<sup>2+</sup>**

$$E_{\text{ads}} = -73.41 \text{ kcal mol}^{-1}$$

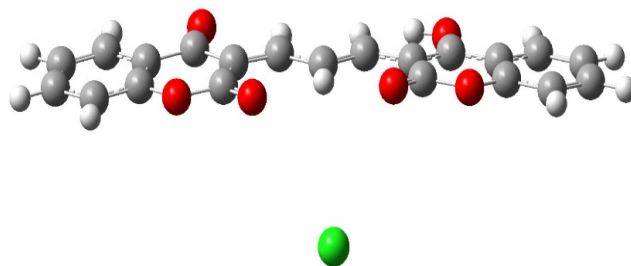

**3-Cl<sup>-</sup>**

$$E_{\text{ads}} = -0.69 \text{ kcal mol}^{-1}$$

**Figure L.1** The most stable configurations for the adsorption of Sn<sup>2+</sup>, Li<sup>+</sup>, Na<sup>+</sup>, and Cl<sup>-</sup> over compound **3** in the EtOH-H<sub>2</sub>O (2/3) medium.
